# Supplementary material for: A Genomic Study of DNA Alteration Events Caused by Ionizing Radiation in Human Embryonic Stem Cells via Next-Generation Sequencing
Source: Stem Cells Int. 2015 Nov 22;2016:1346521. doi: 10.1155/2016/1346521 (PMC4670683; doi:10.1155/2016/1346521)
Supplement: Supplementary file 1 — Supplementary Table 1 lists variants that were present in both irradiated and control cells and were either heterozygous (≈50% frequency) or homozygous (≈50% frequency) reflecting the genetic differences (or single nucleotide polymorphism) between the hESC lines tested and reference, but not genomic changes resulted from IR exposure. Identification of all variants was performed using two parallel analysis tools, Ion Torrent Variant Caller plugin version 4.0 (Life Technologies) and NextGENe software version 2.3.4 (SoftGenetics), with appropriate visual inspection of all alignments. [file 1346521.f1.pdf]

Supplemental Table 1. Variants detected in the four human embryonic stem cell lines that were not related to ionizing radiation exposure

| Cell line | Position       | Gene    | Reference | Variant | Frequency on 314™ chip |        |       | Frequency on 318™ chip |        |       |
|-----------|----------------|---------|-----------|---------|------------------------|--------|-------|------------------------|--------|-------|
|           |                |         |           |         | Control                | 0.2 Gy | 1 Gy  | Control                | 0.2 Gy | 1 Gy  |
| H1        | chr4:1807894   | FGFR3   | G         | A       | 100%                   | 100%   | 100%  | 100%                   | 100%   | 100%  |
|           | chr4:55141055  | PDGFRA  | A         | G       | 100%                   | 99.8%  | 100%  | 100%                   | 100%   | 100%  |
|           | chr4:55593464  | KIT     | A         | C       | 47.3%                  | 47.3%  | 50.4% | 46.6%                  | 48%    | 47.4% |
|           | chr5:112175770 | APC     | G         | A       | 99.8%                  | 100%   | 100%  | 99.9%                  | 100%   | 100%  |
|           | chr7:55249063  | EGFR    | G         | A       | 56.1%                  | 48.7%  | 53.2% | 52.8%                  | 51%    | 51.3% |
|           | chr10:43613843 | RET     | G         | T       | 100%                   | 100%   | 98.6% | 100%                   | 100%   | 100%  |
|           | chr22:24176287 | SMARCB1 | G         | A       | 52.7%                  | 50.3%  | 46.8% | 52.8%                  | 50.1%  | 48.8% |
| H7        | chr4:1807894   | FGFR3   | G         | A       | 100%                   | 100%   | 99.7% | 100%                   | 100%   | 100%  |

|    |                |         |   |   |       |       |       |       |       |       |
|----|----------------|---------|---|---|-------|-------|-------|-------|-------|-------|
|    | chr4:55141055  | PDGFRA  | A | G | 86%   | 96.5% | 69.1% | 100%  | 100%  | 100%  |
|    | chr4:55593481  | KIT     | A | G | 100%  | 100%  | 100%  | 100%  | 100%  | 100%  |
|    | chr4:55946171  | KDR     | G | A | 51.9% | 46.0% | 51.6% | 52.7% | 49.7% | 49.7% |
|    | chr4:55972974  | KDR     | T | A | 50.7% | 52.2% | 44.0% | 48.4% | 49.3% | 50.6% |
|    | chr5:112175770 | APC     | G | A | 100%  | 100%  | 99.1% | 100%  | 100%  | 100%  |
|    | chr7:55249063  | EGFR    | G | A | 100%  | 100%  | 100%  | 100%  | 100%  | 100%  |
|    | chr10:43613843 | RET     | G | T | 51.4% | 46.9% | 53.6% | 53.9% | 51.8% | 52.4% |
|    | chr10:43615633 | RET     | C | G | 45.1% | 49.6% | 50.3% | 49.3% | 47.9% | 51.6% |
|    | chr19:1220321  | STK11   | T | C | 54.1% | 50.4% | 50.4% | 52%   | 54.7% | 51.3% |
|    | chr22:24176287 | SMARCB1 | G | A | 51.6% | 52.2% | 45.6% | 50.4% | 51.6% | 49.1% |
| H9 | chr2:212812097 | ERBB4   | T | C | 66.9% | 61.0% | 62.4% | 66.2% | 60.1% | 59.6% |
|    | chr3:178917005 | PIK3CA  | A | G | 99.8% | 100%  | 97.7% | 98.9% | 100%  | 98.7% |

|     |                |        |   |   |       |       |       |       |       |       |
|-----|----------------|--------|---|---|-------|-------|-------|-------|-------|-------|
|     | chr4:1807894   | FGFR3  | G | A | 100%  | 100%  | 99.7% | 100%  | 100%  | 100%  |
|     | chr4:55141055  | PDGFRA | A | G | 99.8% | 100%  | 98.3% | 100%  | 100%  | 100%  |
|     | chr5:112175770 | APC    | G | A | 98.9% | 99.1% | 98.9% | 100%  | 100%  | 100%  |
|     | chr7:55249063  | EGFR   | G | A | 52.7% | 46.2% | 54.8% | 50.4% | 51.1% | 49.9% |
|     | chr10:43613843 | RET    | G | T | 100%  | 100%  | 100%  | 100%  | 100%  | 100%  |
|     | chr19:1220321  | STK11  | T | C | 49.6% | 54.5% | 43.7% | 53.4% | 56.1% | 49.4% |
| H14 | chr2:29432625  | ALK    | C | A | 21%   | 32.6% | 37.6% | 27.3% | 32.2% | 38.3% |
|     | chr4:1807894   | FGFR3  | G | A | 100%  | 99.6% | 100%  | 100%  | 100%  | 100%  |
|     | chr4:55141055  | PDGFRA | A | G | 100%  | 100%  | 99.8% | 100%  | 100%  | 100%  |
|     | chr4:55593481  | KIT    | A | G | 100%  | 100%  | 100%  | 100%  | 100%  | 100%  |
|     | chr4:55946171  | KDR    | G | A | 49.9% | 47%   | 49.9% | 48.6% | 50.8% | 50.7% |
|     | chr4:55972974  | KDR    | T | A | 51.6% | 50.8% | 50.8% | 50.6% | 50.6% | 51.6% |

|  |                |         |   |   |       |       |       |      |       |      |
|--|----------------|---------|---|---|-------|-------|-------|------|-------|------|
|  | chr5:112175770 | APC     | G | A | 100%  | 100%  | 100%  | 100% | 100%  | 100% |
|  | chr7:55249049  | EGFR    | A | G | 100%  | 100%  | 100%  | 100% | 100%  | 100% |
|  | chr19:1220321  | STK11   | T | C | 100%  | 100%  | 100%  | 100% | 100%  | 100% |
|  | chr22:24176287 | SMARCB1 | G | A | 52.6% | 48.9% | 48.0% | 51%  | 50.2% | 48%  |
